# Supplementary material for: Relationship between haemagglutination inhibition titre and immunity to influenza in ferrets
Source: PubMed Central journal article supplement (PMC4582772; doi:10.1016/j.vaccine.2015.08.065), 2015-10-05
Supplement: mmc2.pdf [file mmc2.pdf]

| Ferret Ref | Treatment 1                    |            |         |                 |                           |       | Post Treatment Virus Isolation |            |       | Treatment 2           |       |         |      |      |       | Pre challenge |                     | Challenge |         |                           |                          | Post challenge |                     |                     | Post Challenge Virus Isolation |            |       | Paper |             |          |         |  |
|------------|--------------------------------|------------|---------|-----------------|---------------------------|-------|--------------------------------|------------|-------|-----------------------|-------|---------|------|------|-------|---------------|---------------------|-----------|---------|---------------------------|--------------------------|----------------|---------------------|---------------------|--------------------------------|------------|-------|-------|-------------|----------|---------|--|
|            | Pre Treatment HI (if measured) | Virus      | Subtype | Type            | Dose                      | Route | Days Post Treatment            | Type       | Titre | Days Post Treatment 1 | Virus | Subtype | Type | Dose | Route | HI titre      | Days Post Treatment | Virus     | Subtype | Dose                      | Days Post Last Treatment | HI titre       | Days Post Challenge | Serologic Response? | Days Post Challenge            | Type       | Titre | Ref # | Lead Author | Pub Year | PMID    |  |
| 278        |                                | HK/1/68    | H3N2    | Infection       | 10 <sup>-6</sup> 7 EID 50 | IN    | 3                              | Nasal Wash | 5.16  |                       |       |         |      |      |       | 2560          | 32                  | HK/1/68   | H3N2    | 10 <sup>-7</sup> EID 50   | 35                       | 1976           | 21                  | N                   | 3                              | Nasal Wash | 0.00  | 19    | McLaren     | 1974     | 4422499 |  |
| 279        |                                | HK/1/68    | H3N2    | Infection       | 10 <sup>-6</sup> 7 EID 50 | IN    | 3                              | Nasal Wash | 5.16  |                       |       |         |      |      |       | >5120         | 32                  | HK/1/68   | H3N2    | 10 <sup>-7</sup> EID 50   | 35                       | 2560           | 21                  | N                   | 3                              | Nasal Wash | 0.00  | 19    | McLaren     | 1974     | 4422499 |  |
| 281        |                                | HK/1/68    | H3N2    | Infection       | 10 <sup>-6</sup> 7 EID 50 | IN    | 3                              | Nasal Wash | 4.5   |                       |       |         |      |      |       | 2560          | 32                  | HK/1/68   | H3N2    | 10 <sup>-7</sup> EID 50   | 35                       | 5120           | 21                  | N                   | 3                              | Nasal Wash | 0.00  | 19    | McLaren     | 1974     | 4422499 |  |
| 285        |                                | PR/8/34    | H3N2    | Infection       | 10 <sup>-6</sup> 7 EID 50 | IN    | 3                              | Nasal Wash | 4.16  |                       |       |         |      |      |       | <5            | 32                  | HK/1/68   | H3N2    | 10 <sup>-7</sup> EID 50   | 35                       | 30             | 21                  | Y                   | 3                              | Nasal Wash | 2.50  | 19    | McLaren     | 1974     | 4422499 |  |
| 286        |                                | PR/8/34    | H3N2    | Infection       | 10 <sup>-6</sup> 7 EID 50 | IN    | 3                              | Nasal Wash | 5.16  |                       |       |         |      |      |       | 5             | 32                  | HK/1/68   | H3N2    | 10 <sup>-7</sup> EID 50   | 35                       | >5120          | 21                  | Y                   | 3                              | Nasal Wash | 4.13  | 19    | McLaren     | 1974     | 4422499 |  |
| 287        |                                | PR/8/34    | H3N2    | Infection       | 10 <sup>-6</sup> 7 EID 50 | IN    | 3                              | Nasal Wash | 5.16  |                       |       |         |      |      |       | <5            | 32                  | HK/1/68   | H3N2    | 10 <sup>-7</sup> EID 50   | 35                       | >5120          | 21                  | Y                   | 3                              | Nasal Wash | 2.13  | 19    | McLaren     | 1974     | 4422499 |  |
| 288        |                                | PR/8/34    | H3N2    | Infection       | 10 <sup>-6</sup> 7 EID 50 | IN    | 3                              | Nasal Wash | 5.5   |                       |       |         |      |      |       | <5            | 32                  | HK/1/68   | H3N2    | 10 <sup>-7</sup> EID 50   | 35                       | 5120           | 21                  | Y                   | 3                              | Nasal Wash | 4.13  | 19    | McLaren     | 1974     | 4422499 |  |
| 289        |                                | PR/8/34    | H3N2    | Infection       | 10 <sup>-6</sup> 7 EID 50 | IN    | 3                              | Nasal Wash | 5.16  |                       |       |         |      |      |       | <5            | 32                  | HK/1/68   | H3N2    | 10 <sup>-7</sup> EID 50   | 35                       | 1280           | 21                  | Y                   | 3                              | Nasal Wash | 4.13  | 19    | McLaren     | 1974     | 4422499 |  |
| 290        |                                | 64b        | H1N2    | Infection       | 10 <sup>-6</sup> 7 EID 50 | IN    | 3                              | Nasal Wash | 5.16  |                       |       |         |      |      |       | <5            | 32                  | HK/1/68   | H3N2    | 10 <sup>-7</sup> EID 50   | 35                       | >5120          | 21                  | Y                   | 3                              | Nasal Wash | 3.83  | 19    | McLaren     | 1974     | 4422499 |  |
| 291        |                                | 64b        | H1N2    | Infection       | 10 <sup>-6</sup> 7 EID 50 | IN    | 3                              | Nasal Wash | 4.5   |                       |       |         |      |      |       | <5            | 32                  | HK/1/68   | H3N2    | 10 <sup>-7</sup> EID 50   | 35                       | 1280           | 21                  | Y                   | 3                              | Nasal Wash | 3.50  | 19    | McLaren     | 1974     | 4422499 |  |
| 292        |                                | 64b        | H1N2    | Infection       | 10 <sup>-6</sup> 7 EID 50 | IN    | 3                              | Nasal Wash | 4.5   |                       |       |         |      |      |       | <5            | 32                  | HK/1/68   | H3N2    | 10 <sup>-7</sup> EID 50   | 35                       | 40             | 21                  | Y                   | 3                              | Nasal Wash | 4.50  | 19    | McLaren     | 1974     | 4422499 |  |
| 293        |                                | 64b        | H1N2    | Infection       | 10 <sup>-6</sup> 7 EID 50 | IN    | 3                              | Nasal Wash | 4.83  |                       |       |         |      |      |       | <5            | 32                  | HK/1/68   | H3N2    | 10 <sup>-7</sup> EID 50   | 35                       | 640            | 21                  | Y                   | 3                              | Nasal Wash | 3.83  | 19    | McLaren     | 1974     | 4422499 |  |
| 301        |                                | 64b        | H1N2    | Infection       | 10 <sup>-6</sup> 7 EID 50 | IN    | 3                              | Nasal Wash | 4.83  |                       |       |         |      |      |       | <5            | 32                  | HK/1/68   | H3N2    | 10 <sup>-7</sup> EID 50   | 35                       | 1280           | 21                  | Y                   | 3                              | Nasal Wash | 2.83  | 19    | McLaren     | 1974     | 4422499 |  |
| 302        |                                | 31a        | H3N1    | Infection       | 10 <sup>-6</sup> 7 EID 50 | IN    | 3                              | Nasal Wash | 4.5   |                       |       |         |      |      |       | 5120          | 32                  | HK/1/68   | H3N2    | 10 <sup>-7</sup> EID 50   | 35                       | 1280           | 21                  | N                   | 3                              | Nasal Wash | 0.00  | 19    | McLaren     | 1974     | 4422499 |  |
| 304        |                                | 31a        | H3N1    | Infection       | 10 <sup>-6</sup> 7 EID 50 | IN    | 3                              | Nasal Wash | 5.16  |                       |       |         |      |      |       | 2560          | 32                  | HK/1/68   | H3N2    | 10 <sup>-7</sup> EID 50   | 35                       | 1920           | 21                  | N                   | 3                              | Nasal Wash | 0.00  | 19    | McLaren     | 1974     | 4422499 |  |
| 305        |                                | 31a        | H3N1    | Infection       | 10 <sup>-6</sup> 7 EID 50 | IN    | 3                              | Nasal Wash | 5.16  |                       |       |         |      |      |       | 960           | 32                  | HK/1/68   | H3N2    | 10 <sup>-7</sup> EID 50   | 35                       | NR             | 21                  | NA                  | 3                              | Nasal Wash | 0.00  | 19    | McLaren     | 1974     | 4422499 |  |
| 308        |                                | 31a        | H3N1    | Infection       | 10 <sup>-6</sup> 7 EID 50 | IN    | 3                              | Nasal Wash | 3.83  |                       |       |         |      |      |       | 240           | 32                  | HK/1/68   | H3N2    | 10 <sup>-7</sup> EID 50   | 35                       | 960            | 21                  | Y                   | 3                              | Nasal Wash | 1.60  | 19    | McLaren     | 1974     | 4422499 |  |
| 283        |                                | NONE       |         |                 |                           |       |                                |            |       |                       |       |         |      |      |       | <5            |                     |           |         |                           |                          |                |                     |                     |                                |            |       |       |             |          |         |  |
| 284        |                                | NONE       |         |                 |                           |       |                                |            |       |                       |       |         |      |      |       | <5            |                     |           |         |                           |                          |                |                     |                     |                                |            |       |       |             |          |         |  |
| 295        |                                | NONE       |         |                 |                           |       |                                |            |       |                       |       |         |      |      |       | <5            |                     |           |         |                           |                          |                |                     |                     |                                |            |       |       |             |          |         |  |
| 296        |                                | NONE       |         |                 |                           |       |                                |            |       |                       |       |         |      |      |       | <5            |                     |           |         |                           |                          |                |                     |                     |                                |            |       |       |             |          |         |  |
| 309        |                                | NONE       |         |                 |                           |       |                                |            |       |                       |       |         |      |      |       | <5            |                     |           |         |                           |                          |                |                     |                     |                                |            |       |       |             |          |         |  |
| 311        |                                | NONE       |         |                 |                           |       |                                |            |       |                       |       |         |      |      |       | <5            |                     |           |         |                           |                          |                |                     |                     |                                |            |       |       |             |          |         |  |
| 261        |                                | HK/1/68    | H3N2    | Infection       | 10 <sup>-6</sup> 7 EID 50 | IN    |                                |            |       |                       |       |         |      |      |       | <5            | 25                  | PR/8/34   | H1N1    | 10 <sup>-6</sup> 7 EID 50 | 28                       | 2560           | 14                  | Y                   | 3                              | Nasal Wash | 4.16  | 19    | McLaren     | 1974     | 4422499 |  |
| 260        |                                | HK/1/68    | H3N2    | Infection       | 10 <sup>-6</sup> 7 EID 50 | IN    |                                |            |       |                       |       |         |      |      |       | <5            | 25                  | PR/8/34   | H1N1    | 10 <sup>-6</sup> 7 EID 50 | 28                       | 480            | 14                  | Y                   | 3                              | Nasal Wash | 6.16  | 19    | McLaren     | 1974     | 4422499 |  |
| 253        |                                | HK/1/68    | H3N2    | Infection       | 10 <sup>-6</sup> 7 EID 50 | IN    |                                |            |       |                       |       |         |      |      |       | <5            | 25                  | PR/8/34   | H1N1    | 10 <sup>-6</sup> 7 EID 50 | 28                       | >5120          | 14                  | Y                   | 3                              | Nasal Wash | 6.51  | 19    | McLaren     | 1974     | 4422499 |  |
| 258        |                                | HK/1/68    | H3N2    | Infection       | 10 <sup>-6</sup> 7 EID 50 | IN    |                                |            |       |                       |       |         |      |      |       | <5            | 25                  | PR/8/34   | H1N1    | 10 <sup>-6</sup> 7 EID 50 | 28                       | 2560           | 14                  | Y                   | 3                              | Nasal Wash | 5.16  | 19    | McLaren     | 1974     | 4422499 |  |
| 249        |                                | HK/1/68    | H3N2    | Infection       | 10 <sup>-6</sup> 7 EID 50 | IN    |                                |            |       |                       |       |         |      |      |       | <5            | 25                  | 64b       | H1N2    | 10 <sup>-6</sup> 7 EID 50 | 28                       | 240            | 14                  | Y                   | 3                              | Nasal Wash | 0.50  | 19    | McLaren     | 1974     | 4422499 |  |
| 252        |                                | HK/1/68    | H3N2    | Infection       | 10 <sup>-6</sup> 7 EID 50 | IN    |                                |            |       |                       |       |         |      |      |       | <5            | 25                  | 64b       | H1N2    | 10 <sup>-6</sup> 7 EID 50 | 28                       | <5             | 14                  | N                   | 3                              | Nasal Wash | 0.00  | 19    | McLaren     | 1974     | 4422499 |  |
| 256        |                                | HK/1/68    | H3N2    | Infection       | 10 <sup>-6</sup> 7 EID 50 | IN    |                                |            |       |                       |       |         |      |      |       | <5            | 25                  | 64b       | H1N2    | 10 <sup>-6</sup> 7 EID 50 | 28                       | 640            | 14                  | Y                   | 3                              | Nasal Wash | 2.00  | 19    | McLaren     | 1974     | 4422499 |  |
| 264        |                                | HK/1/68    | H3N2    | Infection       | 10 <sup>-6</sup> 7 EID 50 | IN    |                                |            |       |                       |       |         |      |      |       | <5            | 25                  | 64b       | H1N2    | 10 <sup>-6</sup> 7 EID 50 | 28                       | 960            | 14                  | Y                   | 3                              | Nasal Wash | 2.83  | 19    | McLaren     | 1974     | 4422499 |  |
| 247        |                                | HK/1/68    | H3N2    | Infection       | 10 <sup>-6</sup> 7 EID 50 | IN    |                                |            |       |                       |       |         |      |      |       | 1200          | 25                  | HK/1/68   | H3N2    | 10 <sup>-6</sup> 7 EID 50 | 28                       | 800            | 14                  | N                   | 3                              | Nasal Wash | 0.00  | 19    | McLaren     | 1974     | 4422499 |  |
| 250        |                                | HK/1/68    | H3N2    | Infection       | 10 <sup>-6</sup> 7 EID 50 | IN    |                                |            |       |                       |       |         |      |      |       | 3200          | 25                  | HK/1/68   | H3N2    | 10 <sup>-6</sup> 7 EID 50 | 28                       | 800            | 14                  | N                   | 3                              | Nasal Wash | 0.00  | 19    | McLaren     | 1974     | 4422499 |  |
| 254        |                                | HK/1/68    | H3N2    | Infection       | 10 <sup>-6</sup> 7 EID 50 | IN    |                                |            |       |                       |       |         |      |      |       | 2400          | 25                  | HK/1/68   | H3N2    | 10 <sup>-6</sup> 7 EID 50 | 28                       | 1200           | 14                  | N                   | 3                              | Nasal Wash | 0.00  | 19    | McLaren     | 1974     | 4422499 |  |
| 262        |                                | HK/1/68    | H3N2    | Infection       | 10 <sup>-6</sup> 7 EID 50 | IN    |                                |            |       |                       |       |         |      |      |       | 400           | 25                  | HK/1/68   | H3N2    | 10 <sup>-6</sup> 7 EID 50 | 28                       | 600            | 14                  | N                   | 3                              | Nasal Wash | 0.00  | 19    | McLaren     | 1974     | 4422499 |  |
| 25         |                                | HK/1/68    | H3N2    | Infection       | 10 <sup>-6</sup> 7 EID 50 | IN    |                                |            |       |                       |       |         |      |      |       | 1280          | 25                  | 31a       | H3N1    | 10 <sup>-6</sup> 7 EID 50 | 28                       | 1280           | 14                  | N                   | 3                              | Nasal Wash | 0.00  | 19    | McLaren     | 1974     | 4422499 |  |
| 32         |                                | HK/1/68    | H3N2    | Infection       | 10 <sup>-6</sup> 7 EID 50 | IN    |                                |            |       |                       |       |         |      |      |       | 2560          | 25                  | 31a       | H3N1    | 10 <sup>-6</sup> 7 EID 50 | 28                       | 2560           | 14                  | N                   | 3                              | Nasal Wash | 0.00  | 19    | McLaren     | 1974     | 4422499 |  |
| 135        |                                | Aichi/2/68 | H3N2    | Vaccine x2 dose | 150 CCA                   | IN    |                                |            |       |                       |       |         |      |      |       | <5            | 35                  | HK/1/68   | H3N2    | 3*10 <sup>6</sup> EID50   | 12                       | 3200           | 21                  | Y                   | 3                              | Nasal Wash | 5.25  | 18    | McLaren     | 1974     | 4830530 |  |
| 138        |                                | Aichi/2/68 | H3N2    | Vaccine x2 dose | 150 CCA                   | IN    |                                |            |       |                       |       |         |      |      |       | <5            | 35                  | HK/1/68   | H3N2    | 3*10 <sup>6</sup> EID50   | 12                       | 2400           | 21                  | Y                   | 3                              | Nasal Wash | 4.75  | 18    | McLaren     | 1974     | 4830530 |  |
| 140        |                                | Aichi/2/68 | H3N2    | Vaccine x2 dose | 150 CCA                   | IN    |                                |            |       |                       |       |         |      |      |       | <5            | 35                  | HK/1/68   | H3N2    | 3*10 <sup>6</sup> EID50   | 12                       | 1200           | 21                  | Y                   | 3                              | Nasal Wash | 6.25  | 18    | McLaren     | 1974     | 4830530 |  |
| 141        |                                | Aichi/2/68 | H3N2    | Vaccine x2 dose | 150 CCA                   | IN    |                                |            |       |                       |       |         |      |      |       | <5            | 35                  | HK/1/68   | H3N2    | 3*10 <sup>6</sup> EID50   | 12                       | 1200           | 21                  | Y                   | 3                              | Nasal Wash | 5.50  | 18    | McLaren     | 1974     | 4830530 |  |
| 129        |                                | Aichi/2/68 | H3N2    | Vaccine x4 dose | 150 CCA                   | IN    |                                |            |       |                       |       |         |      |      |       | <5            | 35                  | HK/1/68   | H3N2    | 3*10 <sup>6</sup> EID50   | 12                       | 2400           | 21                  | Y                   | 3                              | Nasal Wash | 4.50  | 18    | McLaren     | 1974     | 4830530 |  |
| 130        |                                | Aichi/2/68 | H3N2    | Vaccine x4 dose | 150 CCA                   | IN    |                                |            |       |                       |       |         |      |      |       | <5            | 35                  | HK/1/68   | H3N2    | 3*10 <sup>6</sup> EID50   | 12                       | 600            | 21                  | Y                   | 3                              | Nasal Wash | 5.25  | 18    | McLaren     | 1974     | 4830530 |  |
| 131        |                                | Aichi/2/68 | H3N2    | Vaccine x4 dose | 150 CCA                   | IN    |                                |            |       |                       |       |         |      |      |       | <5            | 35                  | HK/1/68   | H3N2    | 3*10 <sup>6</sup> EID50   | 12                       | 1200           | 21                  | Y                   | 3                              | Nasal Wash | 5.75  | 18    | McLaren     | 1974     | 4830530 |  |
| 132        |                                | Aichi/2/68 | H3N2    | Vaccine x4 dose | 150 CCA                   | IN    |                                |            |       |                       |       |         |      |      |       | <5            | 35                  | HK/1/68   | H3N2    | 3*10 <sup>6</sup> EID50   | 12                       | 1200           | 21                  | Y                   | 3                              | Nasal Wash | 5.50  | 18    | McLaren     | 1974     | 4830530 |  |
| 142        |                                | NONE       |         |                 |                           |       |                                |            |       |                       |       |         |      |      |       | <5            | 35                  | HK/1/68   | H3N2    | 3*10 <sup>6</sup> EID50   | 12                       | 800            | 21                  | Y                   | 3                              | Nasal Wash | 5.75  | 18    | McLaren     | 1974     | 4830530 |  |
| 143        |                                | NONE       |         |                 |                           |       |                                |            |       |                       |       |         |      |      |       | <5            | 35                  | HK/1/68   | H3N2    | 3*10 <sup>6</sup> EID50   | 12                       | 1600           | 21                  | Y                   | 3                              | Nasal Wash | 6.25  | 18    | McLaren     | 1974     | 4830530 |  |
| 144        |                                | NONE       |         |                 |                           |       |                                |            |       |                       |       |         |      |      |       | <5            | 35                  | HK/1/68   | H3N2    | 3*10 <sup>6</sup> EID50   | 12                       | 2400           | 21                  | Y                   | 3                              | Nasal Wash | 5.25  | 18    | McLaren     | 1974     | 4830530 |  |
| 145        |                                | NONE       |         |                 |                           |       |                                |            |       |                       |       |         |      |      |       | <5            | 35                  | HK/1/68   | H3N2    | 3*10 <sup>6</sup> EID50   | 12                       | 800            | 21                  | Y                   | 3                              | Nasal Wash | 5.50  | 18    | McLaren     | 1974     | 4830530 |  |
| 418        |                                | PR/8/34    | H1N1    | Infection       |                           |       |                                |            |       |                       |       |         |      |      |       | 60            | 12                  | HK/1/68   | H3N2    | 3*10 <sup>6</sup> EID50   | 12                       | 640            | 21                  | Y                   | 3                              | Nasal Wash | 4.50  | 18    | McLaren     | 1974     | 4830530 |  |
| 419        |                                | PR/8/34    | H1N1    | Infection       |                           |       |                                |            |       |                       |       |         |      |      |       | 30            | 12                  | HK/1/68   | H3N2    | 3*10 <sup>6</sup> EID50   | 12                       | 240            | 21                  | Y                   | 3                              | Nasal Wash | 5.16  | 18    | McLaren     | 1974     | 4830530 |  |
| 420        |                                | PR/8/34    | H1N1    | Infection       |                           |       |                                |            |       |                       |       |         |      |      |       | 120           | 12                  | HK/1/68   | H3N2    | 3*10 <sup>6</sup> EID50   | 12                       | 120            | 21                  | N                   |                                |            |       |       |             |          |         |  |
